# Supplementary material for: FOXO1-suppressed miR-424 regulates the proliferation and osteogenic differentiation of MSCs by targeting FGF2 under oxidative stress
Source: PubMed Central journal article supplement (PMC5301230; doi:10.1038/srep42331), 2017-02-10
Supplement: srep42331-s1.pdf [file srep42331-s1.pdf]

**FOXO1-suppressed miR-424 regulates the proliferation and osteogenic  
differentiation of MSCs by targeting FGF2 under oxidative stress**

Liangping Li <sup>1,2+</sup>, Qihua Qi<sup>1+</sup>, Jiaquan Luo<sup>1</sup>, Sheng Huang<sup>1</sup>, Zemin Ling<sup>1</sup>, Manman Gao<sup>1</sup>, Zhiyu

Zhou<sup>1</sup>, Maik Stiehler<sup>2</sup> & Xuenong Zou<sup>1\*</sup>

<sup>1</sup>Guangdong Provincial Key Laboratory of Orthopaedics and Traumatology, Orthopaedic  
Research Institute /Department of Spinal Surgery, The First Affiliated Hospital of Sun Yat-sen  
University, Guangzhou, 510080, P R China

<sup>2</sup>Centre for Translational Bone, Joint and Soft Tissue Research, Medical Faculty and  
University Centre for Orthopaedics and Trauma Surgery, University Hospital Carl Gustav  
Carus at Technische Universität Dresden, Dresden, 01307, Germany

\* Corresponding author: [zxong@hotmail.com](mailto:zxong@hotmail.com) (X. Zou)

+These authors contributed equally to this work.

**>mir424 promoter**

GAGGGGCGGGGAGAGAAAAC TGAGTAAGGGGCAGTGACCGACTGTCAGCCTCGCTAGGGTCGGGAGCGACTG  
GTTTTGACAGAATGTAATGAACTTTTCCTCTTATTTGCAAGAAGTTAGTTATGTCTTGGAAGAAAATGTGT  
GATTAATTTACATTGTCTCTCCCGAATTTAAACTTTAAAGGTTGTTTAGTTTTCCCGTAGGGACTTGACA  
TTGTGGAAGTTTGGCTAGAATGCGCCGAGAGAAGGTACATCGTGTGTTTGGGGTGTGGGGGACGAAGGCATA  
TGCAAAATTTAAAGACAAAACGTTGTAGAGTATGAACAGAGGAAGAGGCGTATTCTTTGGCTCTTAAATCAT  
TTAGCCAAACACATTGCAGTTT CAGAAGGGGGTGGGGCTATGGCAACTCGAAAGTATCGATTCTTTGTCTATT  
GTATCAGTGAATGACCCTCTCTGAAGTGACAAGACGCCCTTTGTAATCTCTTTTCGTAAGTAAATTTT CAG  
TCTAAGGGGAAAATATGTAAACTAGGGGATCGAGGTGGCTTTTTAGGGGTGTAACCGTTGTACTATCACTGG  
GAGAGATGAAAGGGTTAGGGTGAAGGTATAAATGAATTTGATTGTGGAACAAAATGTTGGGATGTGGAAC  
AAAATGTTGGGATCCAAGAGCAATCTGGAAGGGACCTCG **CTTTGACACCGTGGTGT** TCGAATGAAC**TT**  
**TTGTTTTT**C TAAGTAGTCAACTAAGGAAATGTTAAATTAGGCATGACTTTAACTTCGACATGATGGCTCGT  
ATATTTG **TTTGGAAACAAAATGTTGGGAGAAAAGTTGTGGG**ATTTTACATGATAATTGTACATTTGCTAA**ACAT**  
**GTTTTTT**TTTTCTTTTAAAGGGCAGTCAACGACATTTTTCTCCATTAATCCCAAAGTCAGTGTAAGTTGT  
TTGTAATA**TCATTGCCAAAAACAAGATGGA**ATGTAGAGATACTTGATTGTGCAATTTAGGGAATGGGGTTA  
TTGTTACTAATGACTTTTTTTTTTACCATGACATAGTGATTTGTTACCACTGGATCTCAGTCTGGATGTT  
ATAAATTCGATACTTAATCTTATTAATACTCTGCACATTTTATTAATAATAAATAGGACACTTAACATTC  
ATTGTACTGGTTTTGAAAAACCGACTTAATTTGTAAGTGTAACAAGATACTTACAGTTGGATAATTTAAATG  
TCTATTACTTGTGCTGAAATGTATTTAACTTCAAACCATTACAGTTAGTGCTGATTTTGTGTTTAACT  
TTTAGGTTTTGTGATTGAGGATTT CAGAGTGGGTTTTTTTTTTAATGCTTAATTGAATATTGTATTCAAACAA  
AAAGAGGGCATGCATGTGACTTGTGCTAATATGTGTCCATTTTAAAAGGAAAAAGTGGTATCTAATGAGT  
TAATCATTAAAGGATATGCGCAGTGCCGGCCATTT CAGGACATGAAAGTTTCTGTGGAGCTGCTTGAAACAG  
GAAGGAGCGACTTGACATCAAGTATTTAACTTTTTGATTTATGTTTTGATAGATGACATTGATAGGTATAA  
ATTATAAATAAGTTT GAGTAACCAGTTTAATATGTAACTGGTATTTTATCTACAGAAAGTTCTCTGTCATT  
GTTTGGAGCTCTTTAAAATAACTCAGCTGGGGTGTTTAAGAATAAAAACACTAGCAGTGAGTTAGGACATCT  
AATGCTTTTTAAAGATAGATGTATATGTGCAACGATAGTGTAAGAATCAGCTG **AGGTAAGGTTGAGTTTTT**  
**G**TTATTTTCTTTCAGTCATCTGAGTCCATTTCCAATAAA **GGTTGTTTTTTT**GTGTTTCGTT **TTTTGTTTTTT**T  
TTAATGGGGACAATGAATGAGACTTGTAAT **ATGCAAGTAAAGAAAGTTTCA**CCAAGACTTTGAAACTGGCAA  
GAATGATCCAGATGTCCAATTGCCTCTACTTAACCTTATTCGTCTACCTT CAGAAGTAATTAGATTCTCTTC  
CACACTAATTCGTATCCCCCATCGCTCTGCTTTT CACCCACTACGTTGTTCCAAGATTCATCCTCAGGGGAA  
AAAATTGAGAGCCACACTTTCGGCTCCACCTGCAGCTCCTGAAATCAAATGGTGAAGTTATAAGAAGTACC  
TTAACTTGGAGTGAAGTGGCCTAGTCATAAGTTTTGCCCTATTCCCTTGCAGGGGGTGGGGCGGGCTTCCT  
TCAGTCATCCAGTCTTTATT CACCCGAGGTACCCCGATCGATCCCCCT (**TCATTGACTCCGAGGGGATA**  
**CAGCAGCAATTCATGTTTTGAAGTGTTCTAAATGGTTCAAAACGTGAGGCGCTGCTATACCCCTCGTGGG**  
**AAGGTAGAAGGTGGGGTCT**) **miR424 sequence**

We obtained the human miR-424 promoter and predicted FOXO1 binding sites using the JASPAR database

( [http://jaspar.genereg.net/cgi-bin/jaspar\\_db.pl?rm=browse&db=core&tax\\_group=vertebrates](http://jaspar.genereg.net/cgi-bin/jaspar_db.pl?rm=browse&db=core&tax_group=vertebrates)

) Accordingly, three primers were designed and then PCRs were performed for the analysis of

FOXO1 binding to the promoter of miR-424. The oligonucleotides were as follows:

The primer at -1559bp that encompass FOXO1 BS1 of the human miR-424 promoter( 5'to 3' ):

Forward: CCTTTGACACCGATGCTGTT

Reverse: TCCCAACATTTTGTCCACA

|          |       |       |                   |     |     |   |            |
|----------|-------|-------|-------------------|-----|-----|---|------------|
| MA0480.1 | Foxo1 | 9.284 | 0.883446088820745 | 679 | 689 | 1 | TTTTGTTTTT |
|----------|-------|-------|-------------------|-----|-----|---|------------|

The primer at -1418bp that encompass FOXO1 BS2 of the human miR-424 promoter( 5'to 3' ):

Forward: TGTTGGGAGAAAGTTGTGGA

Reverse: CCATCTTGTTTTGGCAATGA

|          |       |       |                   |     |     |   |            |
|----------|-------|-------|-------------------|-----|-----|---|------------|
| MA0480.1 | Foxo1 | 7.195 | 0.851567806040198 | 821 | 831 | 1 | ACATGTTTTT |
|----------|-------|-------|-------------------|-----|-----|---|------------|

The primer at -412 ~ -443bp that encompass FOXO1 BS3 of the human miR-424 promoter

( 5'to 3' ):

Forward: AAGCTACCGGTGAGGTTTTG

Reverse: TGAACTTCTTCCTGCTGCAT

|          |       |       |                   |      |      |   |            |
|----------|-------|-------|-------------------|------|------|---|------------|
| MA0480.1 | Foxo1 | 9.477 | 0.886391282012054 | 1801 | 1811 | 1 | GGTTGTTTTT |
| MA0480.1 | Foxo1 | 9.710 | 0.889946877937314 | 1821 | 1831 | 1 | TTTTGTTTTT |

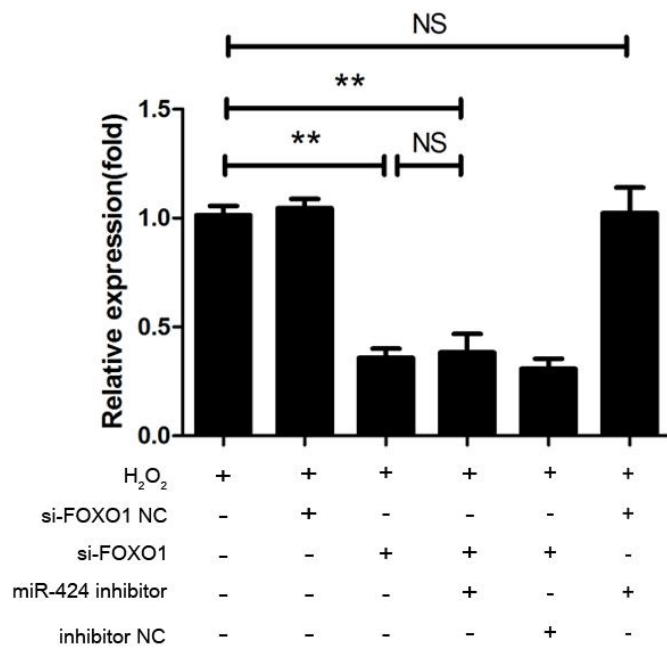

Supplementary Figure 1: FOXO1 mRNA levels after the knockdown of FOXO1 alone and the concomitant knockdown of FOXO1 and miR-424
